# Supplementary material for: Framework to select the top ML classifier for robust seizure detection and prediction: A comparison-based study using multiple preictal time and feature sets
Source: Research Square preprint supplement (doi:10.21203/rs.3.rs-470605/v1), 2021-04-28
Supplement: Supplementary file 1 [file 52685e10ea469cc8c9b7bda5.xlsx]

## Sheet: List of Features
#	Feature	Description
1	F1	The number of phasic peaks per minute
2	F2	Height of the phasic peak
3	F3	The time from the onset of the SCR to the peak
4	F4	The time from the peak to the base
5	F5	Height of tonic peak
6	F6	Coefficient of tonic
7	F7	Height of sudo motor nerve activity
8	F8	% of phasic peaks per minute
9	F9	Unfiltered EDA value
10	F10	Number of phasic peaks in the 25th Quantile
11	F11	Number of phasic peaks in the 50th Quantile
12	F12	Number of phasic peaks in the 75th Quantile
13	F13	Number of phasic peaks in the 85th Quantile
14	F14	Number of phasic peaks in the 95th Quantile
15	F15	Number of EDA peaks
16	F16	Number of EDA peaks after applying low pass filter
17	F17	Slope of EDA
18	F18	Slope of filtered EDA
19	F19	The number of EDA peaks that meets the normal threshold
20	F20	The number of filtered EDA peaks that meets the normal threshold
21	F21	Mean of the filtered(low_pass) EDA
22	F22	Max of the filtered(low_pass) EDA
23	F23	Min of the filtered(low_pass) EDA
24	F24	Mean of EDA
25	F25	Max of EDA
26	F26	Min of EDA
27	F27	Standard deviation of EDA
28	F28	Standard deviation of filtered(low_pass) EDA
29	F29	Variance of filtered(low_pass) EDA
30	F30	Variance of EDA
31	F31	Number of sudo motor nerve activity
32	F32	Smna_count in percentage
33	F33	Number of respirations
34	F34	Mean of RR or NN
35	F35	Min. of RR or NN
36	F36	Max. of RR or NN
37	F37	Standard deviation of NN intervals
38	F38	Mean heart rate
39	F39	Min. heart rate
40	F40	Max. heart rate
41	F41	Max. heart rate
42	F42	The number of adjacent NN intervals that differ from each other by more than 50 ms (NN50) requires a 2 min epoch.
43	F43	The percentage of adjacent NN intervals that differ from each other by more than 50 ms
44	F44	The root mean square of successive differences between normal heartbeats
45	F45	Geometric measure based on 24 h recordings which calculates the integral of the density of the RR interval histogram divided by its height
46	F46	Measures short-term HRV in ms and correlates with baroreflex sensitivity (BRS)
47	F47	Measures short- and long-term HRV in ms and correlates with LF power and BRS
48	F48	Measures the unpredictability of the RR time series
49	F49	Measures the regularity and complexity of a time series
50	F50	Less biased and more reliable measure of signal regularity and complexity
51	F51	Combine power of Frquency Band(HRV)
52	F52	Absolute power of the ultra-low-frequency band (≤0.003 Hz)
53	F53	Absolute power of the very-low-frequency band (0.0033–0.04 Hz)
54	F54	Absolute power of the low-frequency band (0.04–0.15 Hz)
55	F55	Absolute power of the high-frequency band (0.15–0.4 Hz)
56	F56	Ratio of LF-to-HF power
57	F57	Relative power of the low-frequency band (0.04–0.15 Hz) in normal units
58	F58	Relative power of the high-frequency band (0.15–0.4 Hz) in normal units
59	F59	Relative power of the low-frequency band (0.04–0.15 Hz)
60	F60	Relative power of the high-frequency band (0.15–0.4 Hz)
61	F61	Peak frequency of the low-frequency band (0.04–0.15 Hz)
62	F62	Peak frequency of the high-frequency band (0.15–0.4 Hz)
63	F63	Maximum high frequency power
64	F64	Ratio of Maximum high frequency power to Maximum low frequency power
65	F65	Half of high frequency power
66	F66	Ratio of half of high frequency power to half of low frequency power
Unnamed: 0
Peak_Count
Amplitude
Rise_Time_Sec
Recovery_Time_Sec
tonic
tonic_coff
smna
phasic
Date
Eda_Raw
Quantile_25
Quantile_50
Quantile_75
Quantile_85
Quantile_95
peak_count_Ts
peak_count_LPS
Slope_Ts
Slope_Lps
Thres_Inst_peak_rate
Filter_Inst_Rate_Lps
mean_LPS
max_LPS
min_LPS
mean_Ts
max_Ts
min_Ts
Std_Ts
Std_LPS
Var_LPS
Var_Ts
Smna_Count
SMNA_Percentage
Resp_Rate
mean_rr_all
min_rr_all
max_rr_all
sdnn_all
mean_hr_all
min_hr_all
max_hr_all
sdhr_all
nn50_all
pnn50_all
rmssd_all
hti_all
sd1_all
sd2_all
sd1sd2_all
ApEn_all
SampEn_all
tp_all
ulf_all
vlf_all
lf_all
hf_all
lfhf_all
lf_nu_all
hf_nu_all
lf_per_all
hf_per_all
lf_peak_all
hf_peak_all
max_hf
max_lfhf
half_hf
half_lfhf
Feels like
Emotional/Logical
Stress/Relax
Emotion Type
Class
Unnamed: 0
Peak_Count
Amplitude
Rise_Time_Sec
Recovery_Time_Sec
tonic
tonic_coff
smna
phasic
Date
Eda_Raw
Quantile_25
Quantile_50
Quantile_75
Quantile_85
Quantile_95
peak_count_Ts
peak_count_LPS
Slope_Ts
Slope_Lps
Thres_Inst_peak_rate
Filter_Inst_Rate_Lps
mean_LPS
max_LPS
min_LPS
mean_Ts
max_Ts
min_Ts
Std_Ts
Std_LPS
Var_LPS
Var_Ts
Smna_Count
SMNA_Percentage
Resp_Rate
mean_rr_all
min_rr_all
max_rr_all
sdnn_all
mean_hr_all
min_hr_all
max_hr_all
sdhr_all
nn50_all
pnn50_all
rmssd_all
hti_all
sd1_all
sd2_all
sd1sd2_all
ApEn_all
SampEn_all
tp_all
ulf_all
vlf_all
lf_all
hf_all
lfhf_all
lf_nu_all
hf_nu_all
lf_per_all
hf_per_all
lf_peak_all
hf_peak_all
max_hf
max_lfhf
half_hf
half_lfhf
Feels like
Emotional/Logical
Stress/Relax
Emotion Type
Class
Unnamed: 0
Peak_Count
Amplitude
Rise_Time_Sec
Recovery_Time_Sec
tonic
tonic_coff
smna
phasic
Date
Eda_Raw
Quantile_25
Quantile_50
Quantile_75
Quantile_85
Quantile_95
peak_count_Ts
peak_count_LPS
Slope_Ts
Slope_Lps
Thres_Inst_peak_rate
Filter_Inst_Rate_Lps
mean_LPS
max_LPS
min_LPS
mean_Ts
max_Ts
min_Ts
Std_Ts
Std_LPS
Var_LPS
Var_Ts
Smna_Count
SMNA_Percentage
Resp_Rate
mean_rr_all
min_rr_all
max_rr_all
sdnn_all
mean_hr_all
min_hr_all
max_hr_all
sdhr_all
nn50_all
pnn50_all
rmssd_all
hti_all
sd1_all
sd2_all
sd1sd2_all
ApEn_all
SampEn_all
tp_all
ulf_all
vlf_all
lf_all
hf_all
lfhf_all
lf_nu_all
hf_nu_all
lf_per_all
hf_per_all
lf_peak_all
hf_peak_all
max_hf
max_lfhf
half_hf
half_lfhf
Feels like
Emotional/Logical
Stress/Relax
Emotion Type
Class
Unnamed: 0
Peak_Count
Amplitude
Rise_Time_Sec
Recovery_Time_Sec
tonic
tonic_coff
smna
phasic
Date
Eda_Raw
Quantile_25
Quantile_50
Quantile_75
Quantile_85
Quantile_95
peak_count_Ts
peak_count_LPS
Slope_Ts
Slope_Lps
Thres_Inst_peak_rate
Filter_Inst_Rate_Lps
mean_LPS
max_LPS
min_LPS
mean_Ts
max_Ts
min_Ts
Std_Ts
Std_LPS
Var_LPS
Var_Ts
Smna_Count
SMNA_Percentage
Resp_Rate
mean_rr_all
min_rr_all
max_rr_all
sdnn_all
mean_hr_all
min_hr_all
max_hr_all
sdhr_all
nn50_all
pnn50_all
rmssd_all
hti_all
sd1_all
sd2_all
sd1sd2_all
ApEn_all
SampEn_all
tp_all
ulf_all
vlf_all
lf_all
hf_all
lfhf_all
lf_nu_all
hf_nu_all
lf_per_all
hf_per_all
lf_peak_all
hf_peak_all
max_hf
max_lfhf
half_hf
half_lfhf
Feels like
Emotional/Logical
Stress/Relax
Emotion Type
Class
Unnamed: 0
Peak_Count
Amplitude
Rise_Time_Sec
Recovery_Time_Sec
tonic
tonic_coff
smna
phasic
Date
Eda_Raw
Quantile_25
Quantile_50
Quantile_75
Quantile_85
Quantile_95
peak_count_Ts
peak_count_LPS
Slope_Ts
Slope_Lps
Thres_Inst_peak_rate
Filter_Inst_Rate_Lps
mean_LPS
max_LPS
min_LPS
mean_Ts
max_Ts
min_Ts
Std_Ts
Std_LPS
Var_LPS
Var_Ts
Smna_Count
SMNA_Percentage
Resp_Rate
mean_rr_all
min_rr_all
max_rr_all
sdnn_all
mean_hr_all
min_hr_all
max_hr_all
sdhr_all
nn50_all
pnn50_all
rmssd_all
hti_all
sd1_all
sd2_all
sd1sd2_all
ApEn_all
SampEn_all
tp_all
ulf_all
vlf_all
lf_all
hf_all
lfhf_all
lf_nu_all
hf_nu_all
lf_per_all
hf_per_all
lf_peak_all
hf_peak_all
max_hf
max_lfhf
half_hf
half_lfhf
Feels like
Emotional/Logical
Stress/Relax
Emotion Type
Class
Unnamed: 0
Peak_Count
Amplitude
Rise_Time_Sec
Recovery_Time_Sec
tonic
tonic_coff
smna
phasic
Date
Eda_Raw
Quantile_25
Quantile_50
Quantile_75
Quantile_85
Quantile_95
peak_count_Ts
peak_count_LPS
Slope_Ts
Slope_Lps
Thres_Inst_peak_rate
Filter_Inst_Rate_Lps
mean_LPS
max_LPS
min_LPS
mean_Ts
max_Ts
min_Ts
Std_Ts
Std_LPS
Var_LPS
Var_Ts
Smna_Count
SMNA_Percentage
Resp_Rate
mean_rr_all
min_rr_all
max_rr_all
sdnn_all
mean_hr_all
min_hr_all
max_hr_all
sdhr_all
nn50_all
pnn50_all
rmssd_all
hti_all
sd1_all
sd2_all
sd1sd2_all
ApEn_all
SampEn_all
tp_all
ulf_all
vlf_all
lf_all
hf_all
lfhf_all
lf_nu_all
hf_nu_all
lf_per_all
hf_per_all
lf_peak_all
hf_peak_all
max_hf
max_lfhf
half_hf
half_lfhf
Feels like
Emotional/Logical
Stress/Relax
Emotion Type
Class
Unnamed: 0
Peak_Count
Amplitude
Rise_Time_Sec
Recovery_Time_Sec
tonic
tonic_coff
smna
phasic
Date
Eda_Raw
Quantile_25
Quantile_50
Quantile_75
Quantile_85
Quantile_95
peak_count_Ts
peak_count_LPS
Slope_Ts
Slope_Lps
Thres_Inst_peak_rate
Filter_Inst_Rate_Lps
mean_LPS
max_LPS
min_LPS
mean_Ts
max_Ts
min_Ts
Std_Ts
Std_LPS
Var_LPS
Var_Ts
Smna_Count
SMNA_Percentage
Resp_Rate
mean_rr_all
min_rr_all
max_rr_all
sdnn_all
mean_hr_all
min_hr_all
max_hr_all
sdhr_all
nn50_all
pnn50_all
rmssd_all
hti_all
sd1_all
sd2_all
sd1sd2_all
ApEn_all
SampEn_all
tp_all
ulf_all
vlf_all
lf_all
hf_all
lfhf_all
lf_nu_all
hf_nu_all
lf_per_all
hf_per_all
lf_peak_all
hf_peak_all
max_hf
max_lfhf
half_hf
half_lfhf
Feels like
Emotional/Logical
Stress/Relax
Emotion Type
Class
Unnamed: 0
Peak_Count
Amplitude
Rise_Time_Sec
Recovery_Time_Sec
tonic
tonic_coff
smna
phasic
Date
Eda_Raw
Quantile_25
Quantile_50
Quantile_75
Quantile_85
Quantile_95
peak_count_Ts
peak_count_LPS
Slope_Ts
Slope_Lps
Thres_Inst_peak_rate
Filter_Inst_Rate_Lps
mean_LPS
max_LPS
min_LPS
mean_Ts
max_Ts
min_Ts
Std_Ts
Std_LPS
Var_LPS
Var_Ts
Smna_Count
SMNA_Percentage
Resp_Rate
mean_rr_all
min_rr_all
max_rr_all
sdnn_all
mean_hr_all
min_hr_all
max_hr_all
sdhr_all
nn50_all
pnn50_all
rmssd_all
hti_all
sd1_all
sd2_all
sd1sd2_all
ApEn_all
SampEn_all
tp_all
ulf_all
vlf_all
lf_all
hf_all
lfhf_all
lf_nu_all
hf_nu_all
lf_per_all
hf_per_all
lf_peak_all
hf_peak_all
max_hf
max_lfhf
half_hf
half_lfhf
Feels like
Emotional/Logical
Stress/Relax
Emotion Type
Class
Unnamed: 0
Peak_Count
Amplitude
Rise_Time_Sec
Recovery_Time_Sec
tonic
tonic_coff
smna
phasic
Date
Eda_Raw
Quantile_25
Quantile_50
Quantile_75
Quantile_85
Quantile_95
peak_count_Ts
peak_count_LPS
Slope_Ts
Slope_Lps
Thres_Inst_peak_rate
Filter_Inst_Rate_Lps
mean_LPS
max_LPS
min_LPS
mean_Ts
max_Ts
min_Ts
Std_Ts
Std_LPS
Var_LPS
Var_Ts
Smna_Count
SMNA_Percentage
Resp_Rate
mean_rr_all
min_rr_all
max_rr_all
sdnn_all
mean_hr_all
min_hr_all
max_hr_all
sdhr_all
nn50_all
pnn50_all
rmssd_all
hti_all
sd1_all
sd2_all
sd1sd2_all
ApEn_all
SampEn_all
tp_all
ulf_all
vlf_all
lf_all
hf_all
lfhf_all
lf_nu_all
hf_nu_all
lf_per_all
hf_per_all
lf_peak_all
hf_peak_all
max_hf
max_lfhf
half_hf
half_lfhf
Feels like
Emotional/Logical
Stress/Relax
Emotion Type
Class
Unnamed: 0
Peak_Count
Amplitude
Rise_Time_Sec
Recovery_Time_Sec
tonic
tonic_coff
smna
phasic
Date
Eda_Raw
Quantile_25
Quantile_50
Quantile_75
Quantile_85
Quantile_95
peak_count_Ts
peak_count_LPS
Slope_Ts
Slope_Lps
Thres_Inst_peak_rate
Filter_Inst_Rate_Lps
mean_LPS
max_LPS
min_LPS
mean_Ts
max_Ts
min_Ts
Std_Ts
Std_LPS
Var_LPS
Var_Ts
Smna_Count
SMNA_Percentage
Resp_Rate
mean_rr_all
min_rr_all
max_rr_all
sdnn_all
mean_hr_all
min_hr_all
max_hr_all
sdhr_all
nn50_all
pnn50_all
rmssd_all
hti_all
sd1_all
sd2_all
sd1sd2_all
ApEn_all
SampEn_all
tp_all
ulf_all
vlf_all
lf_all
hf_all
lfhf_all
lf_nu_all
hf_nu_all
lf_per_all
hf_per_all
lf_peak_all
hf_peak_all
max_hf
max_lfhf
half_hf
half_lfhf
Feels like
Emotional/Logical
Stress/Relax
Emotion Type
Class
Unnamed: 0
Peak_Count
Amplitude
Rise_Time_Sec
Recovery_Time_Sec
tonic
tonic_coff
smna
phasic
Date
Eda_Raw
Quantile_25
Quantile_50
Quantile_75
Quantile_85
Quantile_95
peak_count_Ts
peak_count_LPS
Slope_Ts
Slope_Lps
Thres_Inst_peak_rate
Filter_Inst_Rate_Lps
mean_LPS
max_LPS
min_LPS
mean_Ts
max_Ts
min_Ts
Std_Ts
Std_LPS
Var_LPS
Var_Ts
Smna_Count
SMNA_Percentage
Resp_Rate
mean_rr_all
min_rr_all
max_rr_all
sdnn_all
mean_hr_all
min_hr_all
max_hr_all
sdhr_all
nn50_all
pnn50_all
rmssd_all
hti_all
sd1_all
sd2_all
sd1sd2_all
ApEn_all
SampEn_all
tp_all
ulf_all
vlf_all
lf_all
hf_all
lfhf_all
lf_nu_all
hf_nu_all
lf_per_all
hf_per_all
lf_peak_all
hf_peak_all
max_hf
max_lfhf
half_hf
half_lfhf
Feels like
Emotional/Logical
Stress/Relax
Emotion Type
Class
Unnamed: 0
Peak_Count
Amplitude
Rise_Time_Sec
Recovery_Time_Sec
tonic
tonic_coff
smna
phasic
Date
Eda_Raw
Quantile_25
Quantile_50
Quantile_75
Quantile_85
Quantile_95
peak_count_Ts
peak_count_LPS
Slope_Ts
Slope_Lps
Thres_Inst_peak_rate
Filter_Inst_Rate_Lps
mean_LPS
max_LPS
min_LPS
mean_Ts
max_Ts
min_Ts
Std_Ts
Std_LPS
Var_LPS
Var_Ts
Smna_Count
SMNA_Percentage
Resp_Rate
mean_rr_all
min_rr_all
max_rr_all
sdnn_all
mean_hr_all
min_hr_all
max_hr_all
sdhr_all
nn50_all
pnn50_all
rmssd_all
hti_all
sd1_all
sd2_all
sd1sd2_all
ApEn_all
SampEn_all
tp_all
ulf_all
vlf_all
lf_all
hf_all
lfhf_all
lf_nu_all
hf_nu_all
lf_per_all
hf_per_all
lf_peak_all
hf_peak_all
max_hf
max_lfhf
half_hf
half_lfhf
Feels like
Emotional/Logical
Stress/Relax
Emotion Type
Class
Unnamed: 0
Peak_Count
Amplitude
Rise_Time_Sec
Recovery_Time_Sec
tonic
tonic_coff
smna
phasic
Date
Eda_Raw
Quantile_25
Quantile_50
Quantile_75
Quantile_85
Quantile_95
peak_count_Ts
peak_count_LPS
Slope_Ts
Slope_Lps
Thres_Inst_peak_rate
Filter_Inst_Rate_Lps
mean_LPS
max_LPS
min_LPS
mean_Ts
max_Ts
min_Ts
Std_Ts
Std_LPS
Var_LPS
Var_Ts
Smna_Count
SMNA_Percentage
Resp_Rate
mean_rr_all
min_rr_all
max_rr_all
sdnn_all
mean_hr_all
min_hr_all
max_hr_all
sdhr_all
nn50_all
pnn50_all
rmssd_all
hti_all
sd1_all
sd2_all
sd1sd2_all
ApEn_all
SampEn_all
tp_all
ulf_all
vlf_all
lf_all
hf_all
lfhf_all
lf_nu_all
hf_nu_all
lf_per_all
hf_per_all
lf_peak_all
hf_peak_all
max_hf
max_lfhf
half_hf
half_lfhf
Feels like
Emotional/Logical
Stress/Relax
Emotion Type
Class
Unnamed: 0
Peak_Count
Amplitude
Rise_Time_Sec
Recovery_Time_Sec
tonic
tonic_coff
smna
phasic
Date
Eda_Raw
Quantile_25
Quantile_50
Quantile_75
Quantile_85
Quantile_95
peak_count_Ts
peak_count_LPS
Slope_Ts
Slope_Lps
Thres_Inst_peak_rate
Filter_Inst_Rate_Lps
mean_LPS
max_LPS
min_LPS
mean_Ts
max_Ts
min_Ts
Std_Ts
Std_LPS
Var_LPS
Var_Ts
Smna_Count
SMNA_Percentage
Resp_Rate
mean_rr_all
min_rr_all
max_rr_all
sdnn_all
mean_hr_all
min_hr_all
max_hr_all
sdhr_all
nn50_all
pnn50_all
rmssd_all
hti_all
sd1_all
sd2_all
sd1sd2_all
ApEn_all
SampEn_all
tp_all
ulf_all
vlf_all
lf_all
hf_all
lfhf_all
lf_nu_all
hf_nu_all
lf_per_all
hf_per_all
lf_peak_all
hf_peak_all
max_hf
max_lfhf
half_hf
half_lfhf
Feels like
Emotional/Logical
Stress/Relax
Emotion Type
Class
Unnamed: 0
Peak_Count
Amplitude
Rise_Time_Sec
Recovery_Time_Sec
tonic
tonic_coff
smna
phasic
Date
Eda_Raw
Quantile_25
Quantile_50
Quantile_75
Quantile_85
Quantile_95
peak_count_Ts
peak_count_LPS
Slope_Ts
Slope_Lps
Thres_Inst_peak_rate
Filter_Inst_Rate_Lps
mean_LPS
max_LPS
min_LPS
mean_Ts
max_Ts
min_Ts
Std_Ts
Std_LPS
Var_LPS
Var_Ts
Smna_Count
SMNA_Percentage
Resp_Rate
mean_rr_all
min_rr_all
max_rr_all
sdnn_all
mean_hr_all
min_hr_all
max_hr_all
sdhr_all
nn50_all
pnn50_all
rmssd_all
hti_all
sd1_all
sd2_all
sd1sd2_all
ApEn_all
SampEn_all
tp_all
ulf_all
vlf_all
lf_all
hf_all
lfhf_all
lf_nu_all
hf_nu_all
lf_per_all
hf_per_all
lf_peak_all
hf_peak_all
max_hf
max_lfhf
half_hf
half_lfhf
Feels like
Emotional/Logical
Stress/Relax
Emotion Type
Class
Unnamed: 0
Peak_Count
Amplitude
Rise_Time_Sec
Recovery_Time_Sec
tonic
tonic_coff
smna
phasic
Date
Eda_Raw
Quantile_25
Quantile_50
Quantile_75
Quantile_85
Quantile_95
peak_count_Ts
peak_count_LPS
Slope_Ts
Slope_Lps
Thres_Inst_peak_rate
Filter_Inst_Rate_Lps
mean_LPS
max_LPS
min_LPS
mean_Ts
max_Ts
min_Ts
Std_Ts
Std_LPS
Var_LPS
Var_Ts
Smna_Count
SMNA_Percentage
Resp_Rate
mean_rr_all
min_rr_all
max_rr_all
sdnn_all
mean_hr_all
min_hr_all
max_hr_all
sdhr_all
nn50_all
pnn50_all
rmssd_all
hti_all
sd1_all
sd2_all
sd1sd2_all
ApEn_all
SampEn_all
tp_all
ulf_all
vlf_all
lf_all
hf_all
lfhf_all
lf_nu_all
hf_nu_all
lf_per_all
hf_per_all
lf_peak_all
hf_peak_all
max_hf
max_lfhf
half_hf
half_lfhf
Feels like
Emotional/Logical
Stress/Relax
Emotion Type
Class
Unnamed: 0
Peak_Count
Amplitude
Rise_Time_Sec
Recovery_Time_Sec
tonic
tonic_coff
smna
phasic
Date
Eda_Raw
Quantile_25
Quantile_50
Quantile_75
Quantile_85
Quantile_95
peak_count_Ts
peak_count_LPS
Slope_Ts
Slope_Lps
Thres_Inst_peak_rate
Filter_Inst_Rate_Lps
mean_LPS
max_LPS
min_LPS
mean_Ts
max_Ts
min_Ts
Std_Ts
Std_LPS
Var_LPS
Var_Ts
Smna_Count
SMNA_Percentage
Resp_Rate
mean_rr_all
min_rr_all
max_rr_all
sdnn_all
mean_hr_all
min_hr_all
max_hr_all
sdhr_all
nn50_all
pnn50_all
rmssd_all
hti_all
sd1_all
sd2_all
sd1sd2_all
ApEn_all
SampEn_all
tp_all
ulf_all
vlf_all
lf_all
hf_all
lfhf_all
lf_nu_all
hf_nu_all
lf_per_all
hf_per_all
lf_peak_all
hf_peak_all
max_hf
max_lfhf
half_hf
half_lfhf
Feels like
Emotional/Logical
Stress/Relax
Emotion Type
Class
Unnamed: 0
Peak_Count
Amplitude
Rise_Time_Sec
Recovery_Time_Sec
tonic
tonic_coff
smna
phasic
Date
Eda_Raw
Quantile_25
Quantile_50
Quantile_75
Quantile_85
Quantile_95
peak_count_Ts
peak_count_LPS
Slope_Ts
Slope_Lps
Thres_Inst_peak_rate
Filter_Inst_Rate_Lps
mean_LPS
max_LPS
min_LPS
mean_Ts
max_Ts
min_Ts
Std_Ts
Std_LPS
Var_LPS
Var_Ts
Smna_Count
SMNA_Percentage
Resp_Rate
mean_rr_all
min_rr_all
max_rr_all
sdnn_all
mean_hr_all
min_hr_all
max_hr_all
sdhr_all
nn50_all
pnn50_all
rmssd_all
hti_all
sd1_all
sd2_all
sd1sd2_all
ApEn_all
SampEn_all
tp_all
ulf_all
vlf_all
lf_all
hf_all
lfhf_all
lf_nu_all
hf_nu_all
lf_per_all
hf_per_all
lf_peak_all
hf_peak_all
max_hf
max_lfhf
half_hf
half_lfhf
Feels like
Emotional/Logical
Stress/Relax
Emotion Type
Class
Unnamed: 0
Peak_Count
Amplitude
Rise_Time_Sec
Recovery_Time_Sec
tonic
tonic_coff
smna
phasic
Date
Eda_Raw
Quantile_25
Quantile_50
Quantile_75
Quantile_85
Quantile_95
peak_count_Ts
peak_count_LPS
Slope_Ts
Slope_Lps
Thres_Inst_peak_rate
Filter_Inst_Rate_Lps
mean_LPS
max_LPS
min_LPS
mean_Ts
max_Ts
min_Ts
Std_Ts
Std_LPS
Var_LPS
Var_Ts
Smna_Count
SMNA_Percentage
Resp_Rate
mean_rr_all
min_rr_all
max_rr_all
sdnn_all
mean_hr_all
min_hr_all
max_hr_all
sdhr_all
nn50_all
pnn50_all
rmssd_all
hti_all
sd1_all
sd2_all
sd1sd2_all
ApEn_all
SampEn_all
tp_all
ulf_all
vlf_all
lf_all
hf_all
lfhf_all
lf_nu_all
hf_nu_all
lf_per_all
hf_per_all
lf_peak_all
hf_peak_all
max_hf
max_lfhf
half_hf
half_lfhf
Feels like
Emotional/Logical
Stress/Relax
Emotion Type
Class
Unnamed: 0
Peak_Count
Amplitude
Rise_Time_Sec
Recovery_Time_Sec
tonic
tonic_coff
smna
phasic
Date
Eda_Raw
Quantile_25
Quantile_50
Quantile_75
Quantile_85
Quantile_95
peak_count_Ts
peak_count_LPS
Slope_Ts
Slope_Lps
Thres_Inst_peak_rate
Filter_Inst_Rate_Lps
mean_LPS
max_LPS
min_LPS
mean_Ts
max_Ts
min_Ts
Std_Ts
Std_LPS
Var_LPS
Var_Ts
Smna_Count
SMNA_Percentage
Resp_Rate
mean_rr_all
min_rr_all
max_rr_all
sdnn_all
mean_hr_all
min_hr_all
max_hr_all
sdhr_all
nn50_all
pnn50_all
rmssd_all
hti_all
sd1_all
sd2_all
sd1sd2_all
ApEn_all
SampEn_all
tp_all
ulf_all
vlf_all
lf_all
hf_all
lfhf_all
lf_nu_all
hf_nu_all
lf_per_all
hf_per_all
lf_peak_all
hf_peak_all
max_hf
max_lfhf
half_hf
half_lfhf
Feels like
Emotional/Logical
Stress/Relax
Emotion Type
Class
Unnamed: 0
Peak_Count
Amplitude
Rise_Time_Sec
Recovery_Time_Sec
tonic
tonic_coff
smna
phasic
Date
Eda_Raw
Quantile_25
Quantile_50
Quantile_75
Quantile_85
Quantile_95
peak_count_Ts
peak_count_LPS
Slope_Ts
Slope_Lps
Thres_Inst_peak_rate
Filter_Inst_Rate_Lps
mean_LPS
max_LPS
min_LPS
mean_Ts
max_Ts
min_Ts
Std_Ts
Std_LPS
Var_LPS
Var_Ts
Smna_Count
SMNA_Percentage
Resp_Rate
mean_rr_all
min_rr_all
max_rr_all
sdnn_all
mean_hr_all
min_hr_all
max_hr_all
sdhr_all
nn50_all
pnn50_all
rmssd_all
hti_all
sd1_all
sd2_all
sd1sd2_all
ApEn_all
SampEn_all
tp_all
ulf_all
vlf_all
lf_all
hf_all
lfhf_all
lf_nu_all
hf_nu_all
lf_per_all
hf_per_all
lf_peak_all
hf_peak_all
max_hf
max_lfhf
half_hf
half_lfhf
Feels like
Emotional/Logical
Stress/Relax
Emotion Type
Class
Unnamed: 0
Peak_Count
Amplitude
Rise_Time_Sec
Recovery_Time_Sec
tonic
tonic_coff
smna
phasic
Date
Eda_Raw
Quantile_25
Quantile_50
Quantile_75
Quantile_85
Quantile_95
peak_count_Ts
peak_count_LPS
Slope_Ts
Slope_Lps
Thres_Inst_peak_rate
Filter_Inst_Rate_Lps
mean_LPS
max_LPS
min_LPS
mean_Ts
max_Ts
min_Ts
Std_Ts
Std_LPS
Var_LPS
Var_Ts
Smna_Count
SMNA_Percentage
Resp_Rate
mean_rr_all
min_rr_all
max_rr_all
sdnn_all
mean_hr_all
min_hr_all
max_hr_all
sdhr_all
nn50_all
pnn50_all
rmssd_all
hti_all
sd1_all
sd2_all
sd1sd2_all
ApEn_all
SampEn_all
tp_all
ulf_all
vlf_all
lf_all
hf_all
lfhf_all
lf_nu_all
hf_nu_all
lf_per_all
hf_per_all
lf_peak_all
hf_peak_all
max_hf
max_lfhf
half_hf
half_lfhf
Feels like
Emotional/Logical
Stress/Relax
Emotion Type
Class
Unnamed: 0
Peak_Count
Amplitude
Rise_Time_Sec
Recovery_Time_Sec
tonic
tonic_coff
smna
phasic
Date
Eda_Raw
Quantile_25
Quantile_50
Quantile_75
Quantile_85
Quantile_95
peak_count_Ts
peak_count_LPS
Slope_Ts
Slope_Lps
Thres_Inst_peak_rate
Filter_Inst_Rate_Lps
mean_LPS
max_LPS
min_LPS
mean_Ts
max_Ts
min_Ts
Std_Ts
Std_LPS
Var_LPS
Var_Ts
Smna_Count
SMNA_Percentage
Resp_Rate
mean_rr_all
min_rr_all
max_rr_all
sdnn_all
mean_hr_all
min_hr_all
max_hr_all
sdhr_all
nn50_all
pnn50_all
rmssd_all
hti_all
sd1_all
sd2_all
sd1sd2_all
ApEn_all
SampEn_all
tp_all
ulf_all
vlf_all
lf_all
hf_all
lfhf_all
lf_nu_all
hf_nu_all
lf_per_all
hf_per_all
lf_peak_all
hf_peak_all
max_hf
max_lfhf
half_hf
half_lfhf
Feels like
Emotional/Logical
Stress/Relax
Emotion Type
Class
Unnamed: 0
Peak_Count
Amplitude
Rise_Time_Sec
Recovery_Time_Sec
tonic
tonic_coff
smna
phasic
Date
Eda_Raw
Quantile_25
Quantile_50
Quantile_75
Quantile_85
Quantile_95
peak_count_Ts
peak_count_LPS
Slope_Ts
Slope_Lps
Thres_Inst_peak_rate
Filter_Inst_Rate_Lps
mean_LPS
max_LPS
min_LPS
mean_Ts
max_Ts
min_Ts
Std_Ts
Std_LPS
Var_LPS
Var_Ts
Smna_Count
SMNA_Percentage
Resp_Rate
mean_rr_all
min_rr_all
max_rr_all
sdnn_all
mean_hr_all
min_hr_all
max_hr_all
sdhr_all
nn50_all
pnn50_all
rmssd_all
hti_all
sd1_all
sd2_all
sd1sd2_all
ApEn_all
SampEn_all
tp_all
ulf_all
vlf_all
lf_all
hf_all
lfhf_all
lf_nu_all
hf_nu_all
lf_per_all
hf_per_all
lf_peak_all
hf_peak_all
max_hf
max_lfhf
half_hf
half_lfhf
Feels like
Emotional/Logical
Stress/Relax
Emotion Type
Class
Unnamed: 0
Peak_Count
Amplitude
Rise_Time_Sec
Recovery_Time_Sec
tonic
tonic_coff
smna
phasic
Date
Eda_Raw
Quantile_25
Quantile_50
Quantile_75
Quantile_85
Quantile_95
peak_count_Ts
peak_count_LPS
Slope_Ts
Slope_Lps
Thres_Inst_peak_rate
Filter_Inst_Rate_Lps
mean_LPS
max_LPS
min_LPS
mean_Ts
max_Ts
min_Ts
Std_Ts
Std_LPS
Var_LPS
Var_Ts
Smna_Count
SMNA_Percentage
Resp_Rate
mean_rr_all
min_rr_all
max_rr_all
sdnn_all
mean_hr_all
min_hr_all
max_hr_all
sdhr_all
nn50_all
pnn50_all
rmssd_all
hti_all
sd1_all
sd2_all
sd1sd2_all
ApEn_all
SampEn_all
tp_all
ulf_all
vlf_all
lf_all
hf_all
lfhf_all
lf_nu_all
hf_nu_all
lf_per_all
hf_per_all
lf_peak_all
hf_peak_all
max_hf
max_lfhf
half_hf
half_lfhf
Feels like
Emotional/Logical
Stress/Relax
Emotion Type
Class
Unnamed: 0
Peak_Count
Amplitude
Rise_Time_Sec
Recovery_Time_Sec
tonic
tonic_coff
smna
phasic
Date
Eda_Raw
Quantile_25
Quantile_50
Quantile_75
Quantile_85
Quantile_95
peak_count_Ts
peak_count_LPS
Slope_Ts
Slope_Lps
Thres_Inst_peak_rate
Filter_Inst_Rate_Lps
mean_LPS
max_LPS
min_LPS
mean_Ts
max_Ts
min_Ts
Std_Ts
Std_LPS
Var_LPS
Var_Ts
Smna_Count
SMNA_Percentage
Resp_Rate
mean_rr_all
min_rr_all
max_rr_all
sdnn_all
mean_hr_all
min_hr_all
max_hr_all
sdhr_all
nn50_all
pnn50_all
rmssd_all
hti_all
sd1_all
sd2_all
sd1sd2_all
ApEn_all
SampEn_all
tp_all
ulf_all
vlf_all
lf_all
hf_all
lfhf_all
lf_nu_all
hf_nu_all
lf_per_all
hf_per_all
lf_peak_all
hf_peak_all
max_hf
max_lfhf
half_hf
half_lfhf
Feels like
Emotional/Logical
Stress/Relax
Emotion Type
Class
Unnamed: 0
Peak_Count
Amplitude
Rise_Time_Sec
Recovery_Time_Sec
tonic
tonic_coff
smna
phasic
Date
Eda_Raw
Quantile_25
Quantile_50
Quantile_75
Quantile_85
Quantile_95
peak_count_Ts
peak_count_LPS
Slope_Ts
Slope_Lps
Thres_Inst_peak_rate
Filter_Inst_Rate_Lps
mean_LPS
max_LPS
min_LPS
mean_Ts
max_Ts
min_Ts
Std_Ts
Std_LPS
Var_LPS
Var_Ts
Smna_Count
SMNA_Percentage
Resp_Rate
[truncated: 2,666 more rows]
